# Supplementary material for: Outcomes in critically ill patients after diaphragmatic stimulation on ventilator-induced diaphragmatic dysfunction: a systematic review
Source: PubMed Central journal article supplement — Eur J Phys Rehabil Med. 2024 Jan 11;59(6):772–81. doi: 10.23736/S1973-9087.23.08031-0 (PMC10794987; doi:10.23736/s1973-9087.23.08031-0), 2024-01-11
Supplement: Supplementary_Digital_Material1.pdf [file Supplementary_Digital_Material1.pdf]

**Research string for Systematic Review: “Outcomes in Critically Ill Patients after Diaphragmatic Stimulation on Ventilator-induced Diaphragmatic Dysfunction: A Systematic Review”**

((("phrenicus"[All Fields]) OR ("diaphragmatic"[All Fields]) OR ("phrenic"[All Fields]) OR ("diaphragm"[MeSH Terms] OR "diaphragm"[All Fields] OR "diaphragms"[All Fields] OR "diaphragm s"[All Fields] OR "diaphragmal"[All Fields]) OR (("VIDD"[All Fields]) OR ("ventilator-induced diaphragm dysfunction"[All Fields])) OR ("electrostimulation"[All Fields] OR "electric stimulation"[All Fields] OR "electrical stimulation"[All Fields] OR "electrotherapy"[All Fields] OR "electrotherapies"[All Fields] OR "neuromuscular stimulation"[All Fields] OR "neuromuscular electric stimulation"[All Fields] OR "neuromuscular electrical stimulation"[All Fields] OR "muscle stimulation"[All Fields] OR "muscular stimulation"[All Fields] OR "muscle excitation"[All Fields] OR "electromyostimulation"[All Fields] OR "NMES"[All Fields] OR "FES"[All Fields]) OR "magnetic stimulation"[All Fields] OR "assistive technology devices"[All Fields]) AND (("critically ill"[All Fields] OR "critical illness"[All Fields] OR "catastrophic illness"[All Fields] OR "critical care"[All Fields] OR "intensive care"[All Fields] OR "intensive care unit"[All Fields] OR "respiratory care units"[All Fields] OR "artificial respiration"[All Fields] OR "mechanical ventilation"[All Fields] OR "artificial ventilation"[All Fields] OR "MICU"[All Fields] OR "Special care unit"[All Fields] OR "intensive treatment unit"[All Fields] OR "intensive therapy unit"[All Fields] OR "critical care unit"[All Fields] OR "ICU"[All Fields] OR "ITU"[All Fields] OR "Ventilation support"[All Fields] OR "Intensive Care Patient"[All Fields] OR "Controlled ventilation"[All Fields] OR "Invasive ventilation"[All Fields] OR "Invasive respiration"[All Fields]))
